# Supplementary material
Source: ML conference proceedings conference paper supplement (https://openaccess.thecvf.com/content/CVPR2026/html/Wang_DualSplat_Robust_3D_CVPR_2026_paper.html)
Supplement: Supplementary file 1 [file Wang_DualSplat_Robust_3D_CVPR_2026_supplemental.pdf]

# DualSplat: Robust 3D Gaussian Splatting via Pseudo-Mask Bootstrapping from Reconstruction Failures

## Supplementary Material

### 6. More Details

#### 6.1. Data Preprocessing and First-Pass Setup

For the stage one reconstruction, we down-sample all training frames by  $4\times$ . The only exception is *Patio*, for which we use a factor  $2\times$ . The same resizing is consistently applied to ground-truth images, first-pass renderings, feature maps, and masks to avoid scale mismatch. After computing the cosine-similarity map from FiT3D features at their native stride, we *bilinearly resample* the similarity map back to the preprocessing resolution used by our pipeline.

#### 6.2. SAM2 Instance Proposals

Rather than using SAM2 with default settings, we bias it toward more masks so that small or partially occluded distractions are not missed. This yields more instance candidates, while the actual transient decision is deferred to our feature and residual filter. In all experiments, instance masks are exported as integer-labeled arrays for efficient per-instance statistics. In all experiments reported in the main paper, we ran SAM2 in automatic mask generation mode. We set SAM2 with

```
points_per_side = 32
points_per_batch = 128
pred_iou_thresh = 0.8
stability_score_thresh = 0.9
box_nms_thresh = 0.8
crop_n_layers = 2
crop_nms_thresh = 0.8
crop_overlap_ratio = 0.6
crop_n_points_downscale_factor = 1
min_mask_region_area = 0
use_m2m = False
multimask_output = True
mask_threshold = 0.0
output_mode = binary_mask
```

Although we used this setting in the paper, further experiments show that simply setting  $crop\_n\_layers = 1$  already covers most cases and is faster.

#### 6.3. Mask Filter: Implementation Specifics

Our filter operates per instance and fuses feature consistency and photometric residuals, constrained by instance

boundaries and geometry sanity checks. Below are the inputs to the mask filter:

- A pixel-wise  $L_1$  map between the first-pass rendering and its ground truth, computed at the same spatial resolution.
- Dense features for both GT and rendering, followed by a pixelwise cosine-similarity map  $S \in [-1, 1]^{H \times W}$ . We apply min-max normalization to  $\hat{S} \in [0, 1]^{H \times W}$  before aggregation.
- SAM2 instance masks.

**Geometry sanity checks.** Before any photometric and feature reasoning, we discard spurious proposals using four methods:

- **Minimum area:** remove masks with  $< 32$  pixels.
- **Minimum short side:** remove masks whose short side of the bbox  $< 5$  px.
- **Minimum fill ratio** (mask area / bbox area): remove if  $< 0.05$ .
- **Minimum global fill ratio** (mask area / image area): remove if  $< 10^{-4}$ .

Only proposals that pass all four checks are carried forward. For each remaining instance  $m$  with the set of pixels  $\Omega_m$ , we accumulate:

$$\mu_m = \frac{1}{|\Omega_m|} \sum_{p \in \Omega_m} \hat{S}(p), \quad \bar{\ell}_m = \frac{1}{|\Omega_m|} \sum_{p \in \Omega_m} L_1(p). \quad (17)$$

An instance is accepted as *transient* if  $\mu_m \leq \tau_{sim}$  and  $\bar{\ell}_m \geq \tau_{L1}$ . The final pseudo-masks  $M_{pseudo}$  are the union of the retained instances. We also sweep  $\tau_{sim} \in \{0.65, 0.70, 0.75, 0.80, 0.85\}$ ,  $\tau_{L1} \in \{0, 0.05, 0.10\}$ . And we report mask-level Accuracy, Precision, Recall, and IoU (all in %) in Tab. 7. From the ablation, increasing  $\tau_{sim}$  makes the similarity gate looser, so more instances are flagged as transient. This typically raises the recall and overall detection capacity, but also introduces more false positives, lowering the precision. In contrast, increasing  $\tau_{L1}$  makes the residual requirement stricter, which filters out hard-to-render yet static regions; this improves precision and IoU at the cost of reduced recall. Across the sweep over  $\tau_{sim}$  and  $\tau_{L1}$ , we observe stable trends and no sensitivity spikes, indicating that the filter is reasonably robust to threshold choices. We adopt  $(\tau_{sim}, \tau_{L1}) = (0.75, 0.05)$  as a balanced operating point that trades off missed detections and false alarms.

Table 7. Parameter sensitivity of  $\tau_{\text{sim}}$  and  $\tau_{L1}$

| Accuracy  |       |       |       |
|-----------|-------|-------|-------|
|           | 0     | 0.05  | 0.1   |
| 0.65      | 0.981 | 0.984 | 0.988 |
| 0.7       | 0.974 | 0.981 | 0.983 |
| 0.75      | 0.965 | 0.976 | 0.981 |
| 0.8       | 0.950 | 0.967 | 0.979 |
| 0.85      | 0.924 | 0.957 | 0.977 |
| Precision |       |       |       |
|           | 0     | 0.05  | 0.1   |
| 0.65      | 0.856 | 0.868 | 0.873 |
| 0.7       | 0.830 | 0.854 | 0.866 |
| 0.75      | 0.802 | 0.841 | 0.861 |
| 0.8       | 0.767 | 0.817 | 0.848 |
| 0.85      | 0.710 | 0.784 | 0.834 |
| Recall    |       |       |       |
|           | 0     | 0.05  | 0.1   |
| 0.65      | 0.946 | 0.945 | 0.928 |
| 0.7       | 0.949 | 0.948 | 0.931 |
| 0.75      | 0.952 | 0.951 | 0.934 |
| 0.8       | 0.955 | 0.953 | 0.935 |
| 0.85      | 0.957 | 0.955 | 0.938 |
| IoU       |       |       |       |
|           | 0     | 0.05  | 0.1   |
| 0.65      | 0.846 | 0.858 | 0.848 |
| 0.7       | 0.822 | 0.846 | 0.844 |
| 0.75      | 0.798 | 0.835 | 0.841 |
| 0.8       | 0.763 | 0.813 | 0.830 |
| 0.85      | 0.708 | 0.781 | 0.816 |

## 6.4. Lightweight Mask Estimator

**Inputs and Notation.** We use the DINOv2 [17] model to extract image features and resize them to the training view resolution with bilinear sampling. Let the per-pixel feature map be  $F \in \mathbb{R}^{C \times H \times W}$  with  $C=384$ , and the per-pixel depth residual map be  $D \in \mathbb{R}^{H \times W}$ . Denote the pixel set by  $\mathcal{P}$  with  $|\mathcal{P}|=HW$ . For any pixel  $p \in \mathcal{P}$ , let  $f_p \in \mathbb{R}^{384}$  be the feature vector and  $d_p \in \mathbb{R}$  the depth residual.  $F$  is reshaped to  $(|\mathcal{P}|, C)$  to apply the network pixelwise;  $D$  is reshaped to  $(|\mathcal{P}|, 1)$  and concatenated with an intermediate representation.

**Network Architecture.** The model consists of two fully-connected (per-pixel) submodules in series, with

ReLU/Sigmoid activations:

$$\begin{aligned} h_p &= \text{ReLU}(W_1 f_p + b_1), & W_1 &\in \mathbb{R}^{16 \times 384}, \\ z_p &= \sigma(W_2 h_p + b_2), & W_2 &\in \mathbb{R}^{8 \times 16}, \\ u_p &= [z_p; d_p] \in \mathbb{R}^9, \\ \hat{m}_p &= \sigma(w_3^\top u_p + b_3) > 0.2, & w_3 &\in \mathbb{R}^9. \end{aligned}$$

Here  $\sigma(\cdot)$  denotes the Sigmoid. After reshaping  $\{\hat{m}_p\}_{p \in \mathcal{P}}$  back to the image resolution and dilating, it yields the final mask  $\hat{M} \in \{0, 1\}^{1 \times H \times W}$  which is applied to reconstruction.

## 7. Additional Experiments

### 7.1. More scenes of NeRF On-the-go dataset

Beyond the main benchmarks, we further evaluate on an extended subset of the NeRF On-the-go dataset that contains in-the-wild handheld captures with natural distractions. We select five scenes: drone, train station, train, statue, and tree. We select these scenes because they do not require additional processing on the test set. Unless otherwise stated, we follow the same training schedule and hyperparameters as in the main paper. We report per-scene PSNR, SSIM and LPIPS in Tab. 8 to quantify reconstruction quality.

## 8. Runtime

We also present the runtime efficiency of DualSplat. All methods are executed on a single RTX 3090 GPU and follow the identical optimization schedule. To isolate our algorithmic overhead, the reported times exclude SAM2 preprocessing, as the mask generation time can vary substantially with its hyperparameters. Tab. 9 summarizes the runtime comparison.

**SAM2 Preprocessing Sensitivity.** Since SAM2 preprocessing constitutes the main external cost, we report the SAM2 preprocessing time under different hyperparameter settings. Tab. 10 reports the average processing time per image under varying configurations together with the corresponding mean reconstruction metrics on the NeRF On-the-go dataset. The additional SAM2 preprocessing cost can be flexibly adjusted according to available computational resources without materially affecting the reconstruction quality.

## 9. Mask Visualization

Fig. 7 compares our transient-mask estimates with existing methods. Our approach more effectively filters transient objects while preserving static regions, thereby reducing artifacts in the rendered images and improving detail sharpness.

Table 8. Comparison on additional scenes of the NeRF On-the-go Dataset. For better visualization, the 1st, 2nd and 3rd best results are highlighted.

| Method                 | drone        |              |              | statue       |              |              | train        |              |              | train_station |              |              | tree         |              |              | Mean         |              |              |
|------------------------|--------------|--------------|--------------|--------------|--------------|--------------|--------------|--------------|--------------|---------------|--------------|--------------|--------------|--------------|--------------|--------------|--------------|--------------|
|                        | PSNR         | SSIM         | LPIPS        | PSNR         | SSIM         | LPIPS        | PSNR         | SSIM         | LPIPS        | PSNR          | SSIM         | LPIPS        | PSNR         | SSIM         | LPIPS        | PSNR         | SSIM         | LPIPS        |
| 3DGS [8]               | <b>20.05</b> | 0.793        | <b>0.150</b> | 15.10        | 0.616        | 0.285        | 21.40        | 0.766        | 0.126        | 20.56         | 0.814        | 0.119        | 19.62        | 0.634        | 0.146        | 19.35        | 0.725        | 0.165        |
| WildGaussians [10]     | 19.84        | 0.768        | 0.182        | <b>17.04</b> | 0.795        | <b>0.213</b> | <b>23.20</b> | 0.806        | 0.138        | <b>21.12</b>  | 0.814        | 0.162        | <b>22.66</b> | 0.829        | 0.101        | <b>20.77</b> | <b>0.802</b> | 0.159        |
| DeSplat [31]           | 19.18        | 0.768        | 0.190        | 15.98        | <b>0.799</b> | 0.258        | 22.13        | 0.784        | 0.168        | 19.18         | 0.790        | 0.177        | 22.55        | 0.845        | 0.095        | 19.80        | 0.797        | 0.178        |
| SpotLessSplats [24]    | 19.43        | 0.751        | 0.188        | 15.32        | 0.749        | 0.235        | 22.52        | 0.791        | 0.133        | 20.54         | 0.783        | 0.166        | 22.40        | 0.817        | 0.096        | 20.04        | 0.778        | 0.164        |
| RobustSplat [6]        | <b>19.77</b> | <b>0.793</b> | 0.159        | <b>16.43</b> | <b>0.812</b> | <b>0.157</b> | <b>22.86</b> | <b>0.820</b> | <b>0.110</b> | <b>21.62</b>  | <b>0.841</b> | <b>0.114</b> | <b>23.06</b> | <b>0.862</b> | <b>0.070</b> | <b>20.75</b> | <b>0.826</b> | <b>0.122</b> |
| 3DGS with pseudo-masks | 19.74        | <b>0.787</b> | <b>0.153</b> | 15.10        | 0.726        | 0.247        | 22.52        | 0.806        | <b>0.105</b> | <b>20.75</b>  | <b>0.823</b> | 0.121        | 22.48        | <b>0.850</b> | <b>0.075</b> | <b>20.12</b> | 0.798        | <b>0.140</b> |
| Ours                   | <b>19.95</b> | <b>0.794</b> | <b>0.157</b> | <b>16.70</b> | <b>0.808</b> | <b>0.159</b> | <b>23.07</b> | <b>0.821</b> | <b>0.110</b> | <b>21.68</b>  | <b>0.841</b> | <b>0.114</b> | <b>22.99</b> | <b>0.862</b> | <b>0.071</b> | <b>20.88</b> | <b>0.825</b> | <b>0.122</b> |

Table 9. Time consumption of different stages. We present the consumption of 3DGS as a baseline.

| Method  | Corner    | Fountain  | Mountain  | Patio-High | Spot      | Patio    | Mean      |
|---------|-----------|-----------|-----------|------------|-----------|----------|-----------|
| 3DGS    | 803.489s  | 1042.167s | 881.698s  | 994.384s   | 862.851s  | 731.072s | 885.943s  |
| Stage 1 | 512.684s  | 727.496s  | 552.997s  | 1066.476s  | 657.683s  | 441.534s | 659.812s  |
| Stage 2 | 1114.166s | 1276.067s | 1325.501s | 1346.641s  | 1141.181s | 1332.23s | 1255.964s |

Table 10. Comparison of different settings.

| Method                         | Low Occlusion |              |              |              |              |              | Medium Occlusion |              |              |              |              |              | High Occlusion |              |              |              |              |              | Mean         |              |              |
|--------------------------------|---------------|--------------|--------------|--------------|--------------|--------------|------------------|--------------|--------------|--------------|--------------|--------------|----------------|--------------|--------------|--------------|--------------|--------------|--------------|--------------|--------------|
|                                | PSNR          | SSIM         | LPIPS        | PSNR         | SSIM         | LPIPS        | PSNR             | SSIM         | LPIPS        | PSNR         | SSIM         | LPIPS        | PSNR           | SSIM         | LPIPS        | PSNR         | SSIM         | LPIPS        | PSNR         | SSIM         | LPIPS        |
| Ours with default SAM2 setting | 21.85         | 0.747        | 0.127        | <b>21.37</b> | <b>0.706</b> | 0.131        | 26.29            | 0.891        | 0.056        | 21.53        | 0.828        | 0.081        | 25.69          | 0.907        | 0.046        | 23.25        | 0.836        | <b>0.094</b> | 23.33        | 0.819        | 0.089        |
| Ours                           | <b>21.86</b>  | <b>0.747</b> | <b>0.127</b> | 21.28        | 0.706        | <b>0.130</b> | <b>26.53</b>     | <b>0.897</b> | <b>0.053</b> | <b>21.64</b> | <b>0.828</b> | <b>0.080</b> | <b>25.96</b>   | <b>0.908</b> | <b>0.046</b> | <b>23.26</b> | <b>0.836</b> | 0.095        | <b>23.42</b> | <b>0.820</b> | <b>0.088</b> |

| Settings                  | Time consumption per image |
|---------------------------|----------------------------|
| SAM2 with default setting | 1.6155s                    |
| SAM2 with ours setting    | 26.4248s                   |

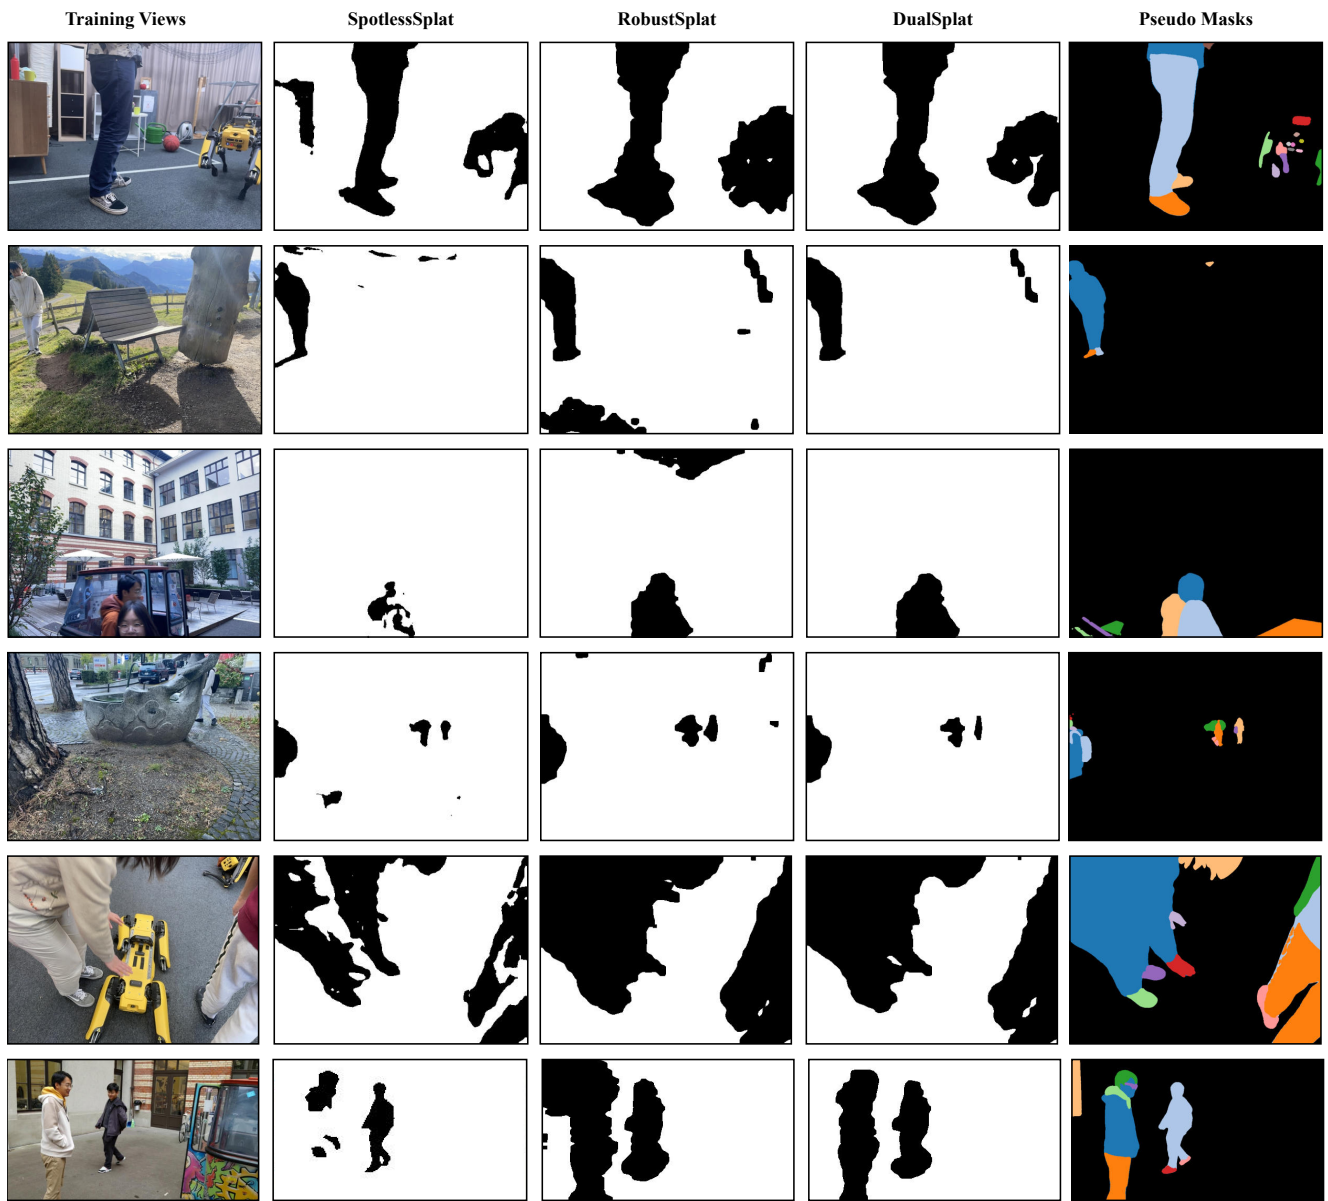

Figure 7. Mask comparison.
